# Supplementary material for: Decreased long intergenic noncoding RNA P7 predicts unfavorable prognosis and promotes tumor proliferation via the modulation of the STAT1-MAPK pathway in hepatocellular carcinoma
Source: PubMed Central journal article supplement (PMC6281420; doi:10.18632/oncotarget.23282), 2017-12-08
Supplement: oncotarget-09-36057-s001.pdf [file oncotarget-09-36057-s001.pdf]

## Decreased long intergenic noncoding RNA P7 predicts unfavorable prognosis and promotes tumor proliferation via the modulation of the STAT1-MAPK pathway in hepatocellular carcinoma

### SUPPLEMENTARY MATERIALS

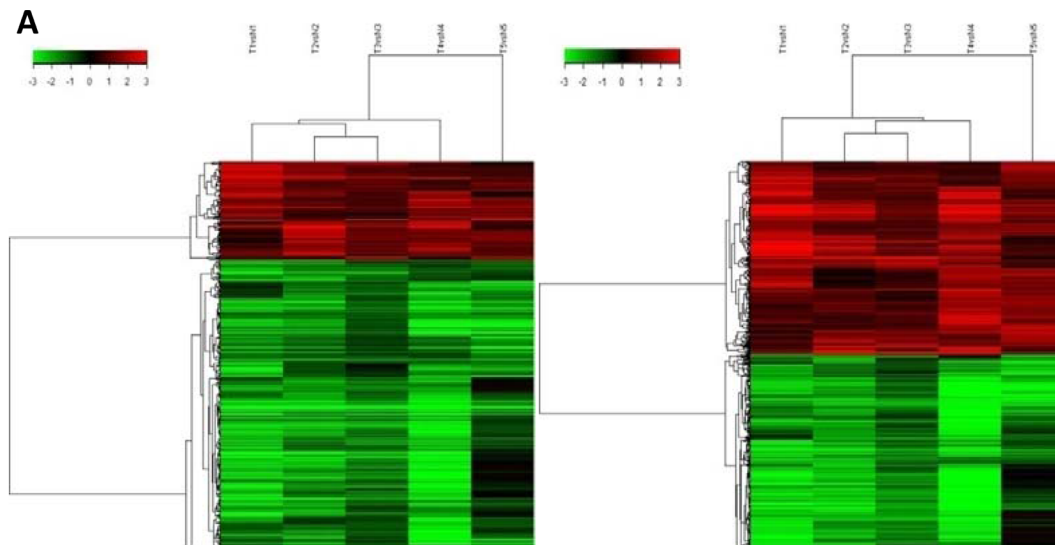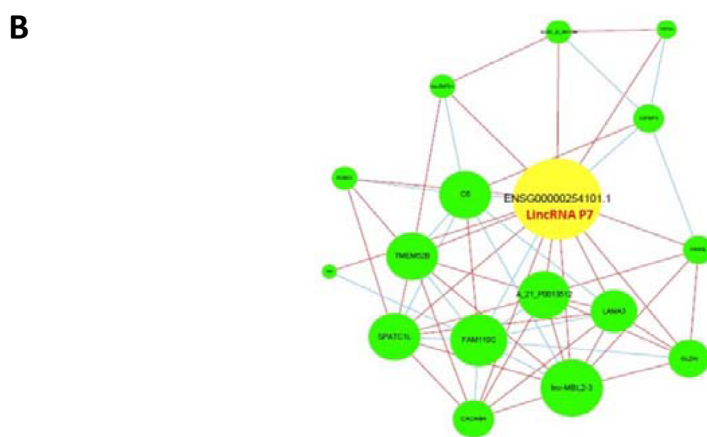

**C**

```

AGCTGAGGGAGCCGGCTGCGGCCTTCGCCAGCCCAGAAAGGGGCTCCTACAGTGCAGTGGCGGGCTGAA
GGGCTGCTCAAGCGCCGCCAAAGTGGGAGCCCAGGCAGAGGAGGCGCCAGAGCGAGCGAGGGCTGTG
AGGACTGCCAGCAGCTGTACCTCTCACTCATATAGATTGCCAATCTATTTGTGAACCAAGTTTGCTGGAGT
TTGATTACTACTGAGTCATATTTGGAGCATGCTGGAATCTTACAACCTGAGATTACCGAGTCAGAACTAGT
TTGACTGTTCTCGTCGGCATGGTTGAGACATTATCCCTGGCAGAAGGCTGGACTGGCATGGACATCATTGA
TGAGTTCGTCTCCTCTTAAACATCAAAGCCTGTTTTCCAGTGCGAATAAACTGTTGCCTATATATTGTTTTCCC
ATTTTTATAGTTGTTTACTGCAAAAAAGAGTCTGGTACAAGTTACTTTGCTAAAACCTTGATAAAGTTTTATTC
TACGATTCTTCAATCAATGTTTCTGTTTTGTTTATTCTGTTATCTCTGTTGTGTCATACCATAATTCTCTCATTAA

```

**Supplementary Figure 1:** (A) Hierarchical clustering of 5 HCC tumor tissues and paired adjacent tissues samples using deregulated long noncoding RNAs (fold change > 2). Expression values are indicated as high (red) or low (blue). T represents tumor tissue and N represents adjacent normal tissue. (B) Co-expression analysis of lincRNA P7 and mRNA. (C) The full sequence of lincRNA P7.

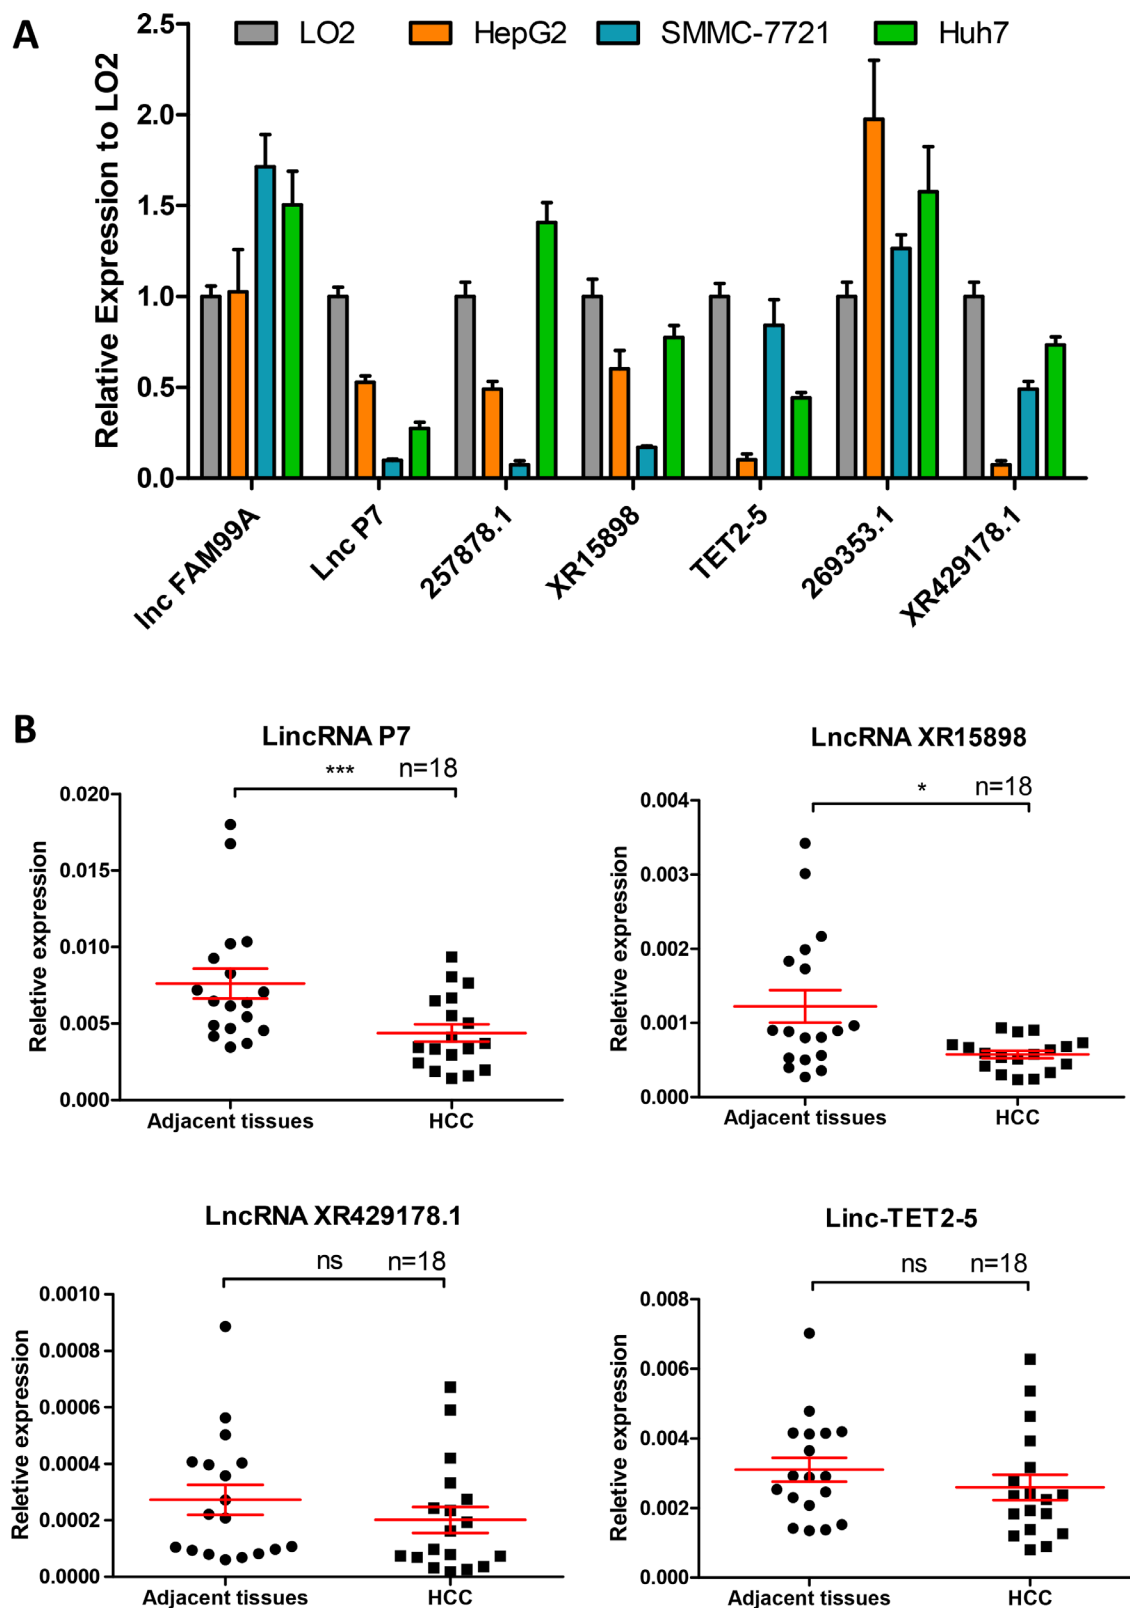

**Supplementary Figure 2:** (A) Relative expression of 7lncRNAs, whose expression levels were significantly correlated with their corresponding 25 mRNAs, in the normal human liver cell line LO2 and in the HCC cell lines HepG2, Huh7 and SMMC-7721. (B) 4 lncRNAs whose alterations were consistent with the microarray results were validated in clinical specimens ( $n = 18$ ).

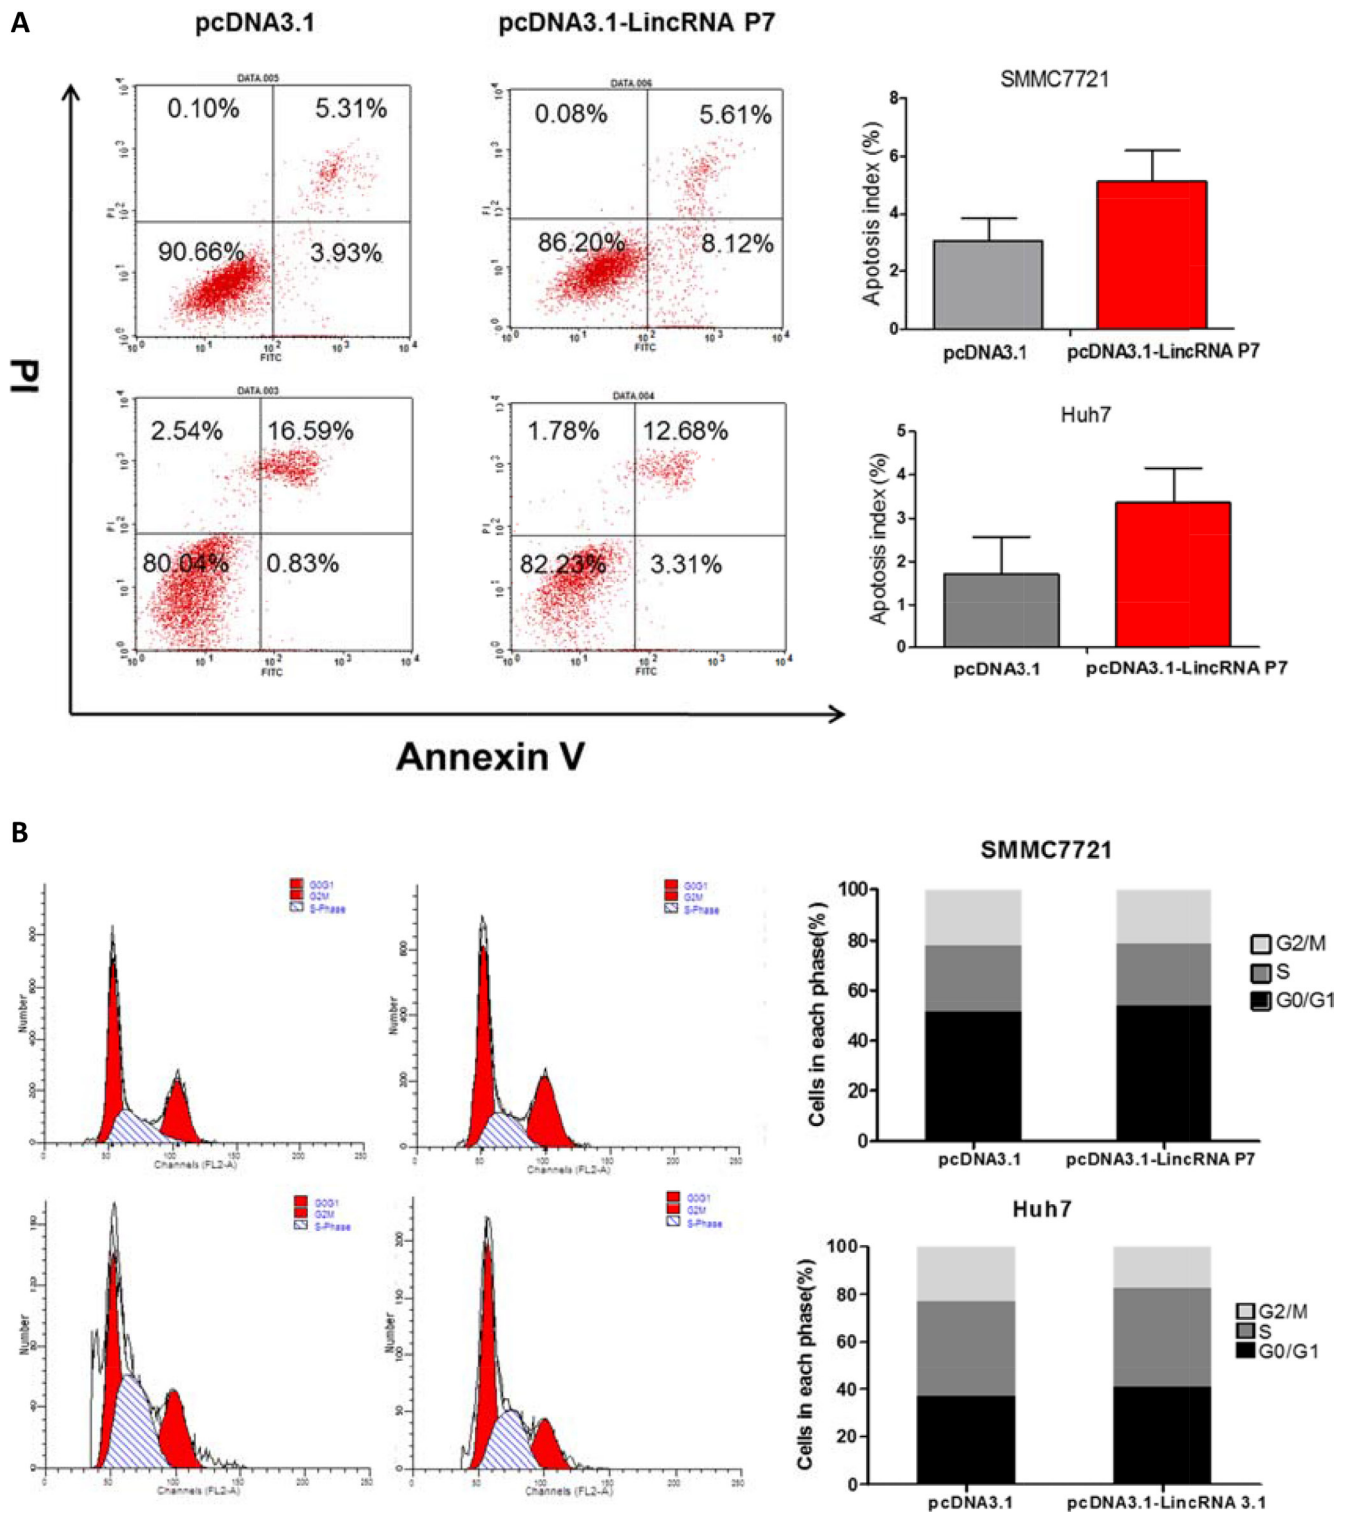

**Supplementary Figure 3:** Flow cytometry assays were performed to analyze the cell apoptosis (A) and the cell cycle (B) in SMMC7721 and Huh7 cells transfected with pcDNA3.1-lincRNA P7 for 48 h.

A

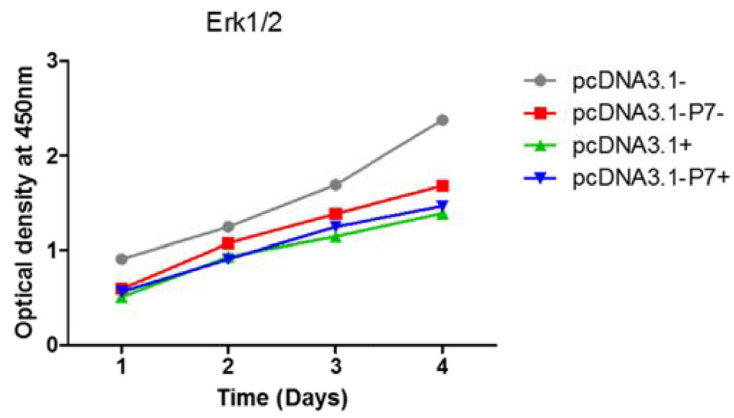

|                       |   |   |   |   |
|-----------------------|---|---|---|---|
| pcDNA3.1 :            | + | - | + | - |
| pcDNA3.1-LincRNA P7 : | - | + | - | + |
| SCH772984 :           | - | - | + | + |

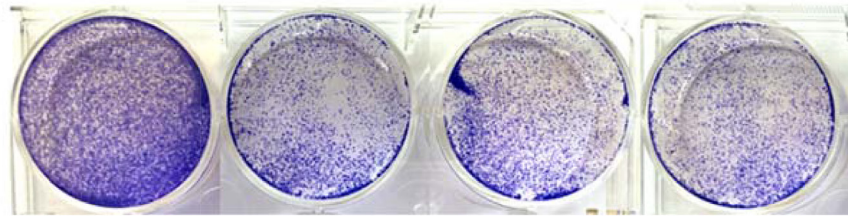

B

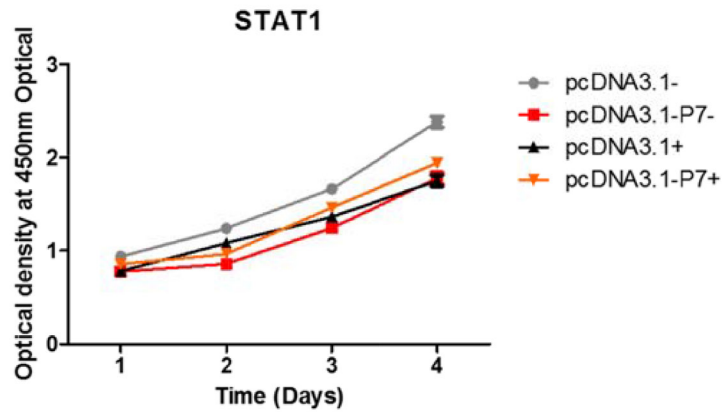

|                       |   |   |   |   |
|-----------------------|---|---|---|---|
| pcDNA3.1 :            | + | - | + | - |
| pcDNA3.1-LincRNA P7 : | - | + | - | + |
| Fludarabine :         | - | - | + | + |

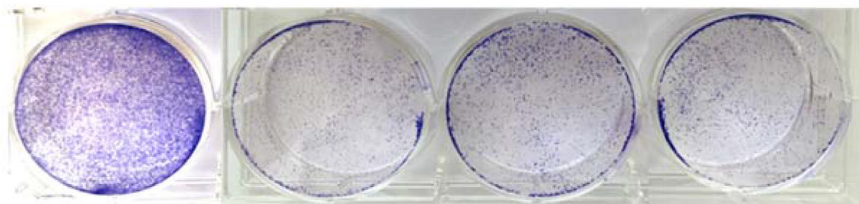

Supplementary Figure 4: CCK-8 assay and colony-forming assay were conducted to determine the effect of pcDNA3.1-lincRNA P7 on cell proliferation in HCC cells treated with SCH772984 (4 nM) and Fludarabine (5 μM), respectively.

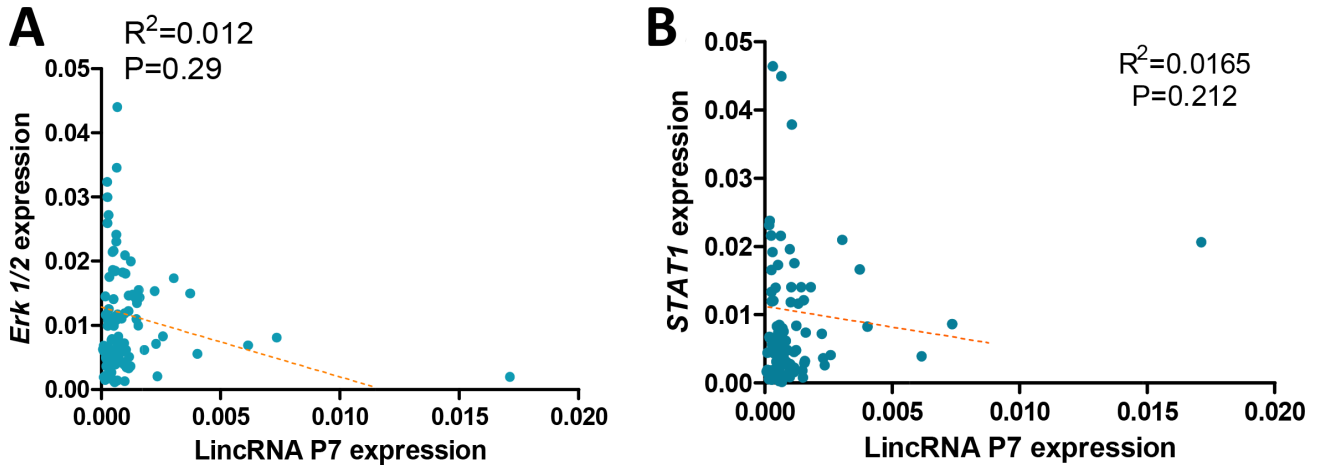

**Supplementary Figure 5:** Correlations between lincRNA P7 levels and the mRNA levels of ERK (A) and STAT1 (B) ( $n = 60$ ). RNA levels were determined by qRT-PCR relative to GAPDH. The  $r$  values and  $P$  values are derived from Pearson's correlation analysis.

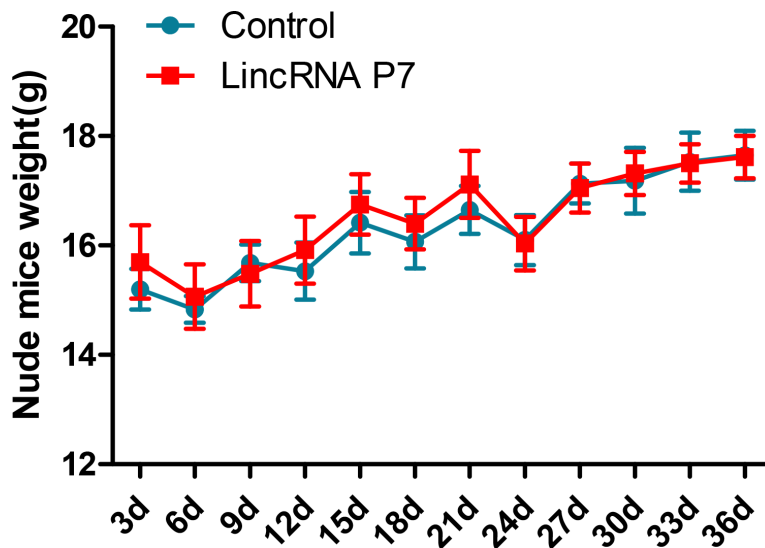

**Supplementary Figure 6:** SMMC7721 cells ( $5 \times 10^6$ ) that stably expressed lincRNA P7 were inoculated into nude mice, and no significant effect of lincRNA P7 on the weight of the mice was observed. Mice were weighed every 3 days for 42 days ( $n = 6$ ).

**Supplementary Table 1: The relationship between lncRNA P7 expression and the clinicopathological features of HCC**

| Parameters             | Group         | Total | P7 expression |      | P value |
|------------------------|---------------|-------|---------------|------|---------|
|                        |               |       | Low           | High |         |
| Gender                 | Male          | 88    | 43            | 45   | 0.810   |
|                        | Female        | 20    | 11            | 9    |         |
| Age (years)            | < 60          | 35    | 19            | 16   | 0.681   |
|                        | ≥ 60          | 73    | 35            | 38   |         |
| Tumor size (cm)        | < 5 cm        | 62    | 30            | 32   | 0.846   |
|                        | ≥ 5 cm        | 46    | 24            | 22   |         |
| AFP                    | < 20          | 35    | 15            | 20   | 0.411   |
|                        | ≥ 20          | 73    | 39            | 34   |         |
| Histological grade     | Well/Moderate | 14    | 8             | 6    | 0.776   |
|                        | Poor          | 94    | 46            | 48   |         |
| Clinical stage         | I and II      | 81    | 37            | 44   | < 0.05  |
|                        | III           | 27    | 17            | 10   |         |
| Tumor number           | Solitary      | 91    | 43            | 48   | 0.290   |
|                        | Multiple      | 17    | 11            | 6    |         |
| Drinking status        | Yes           | 46    | 21            | 25   | 0.999   |
|                        | No            | 62    | 33            | 39   |         |
| Smoking status         | Yes           | 56    | 26            | 30   | 0.563   |
|                        | No            | 52    | 28            | 24   |         |
| HBV                    | Yes           | 68    | 51            | 17   | < 0.001 |
|                        | No            | 40    | 3             | 37   |         |
| Recurrence             | Yes           | 29    | 19            | 10   | < 0.05  |
|                        | No            | 79    | 35            | 44   |         |
| PVTT                   | Yes           | 50    | 26            | 24   | 0.847   |
|                        | No            | 58    | 28            | 30   |         |
| Microvascular invasion | Yes           | 85    | 43            | 42   | 0.999   |
|                        | No            | 23    | 11            | 12   |         |
| Liver cirrhosis        | Absence       | 61    | 49            | 12   | < 0.001 |
|                        | Presence      | 47    | 5             | 42   |         |
